# Supplementary material
Source: publisher figshare collection journal article supplement (https://frontiersin.figshare.com/ndownloader/files/22917977)
Supplement: Supplementary file [file 22917977]

Table S2. GO terms enrichment analysis.

**a) BP**

| <i>Term</i>                                                         | <i>P Value</i> | <i>Genes</i>                  |
|---------------------------------------------------------------------|----------------|-------------------------------|
| GO:0006123~mitochondrial electron transport, cytochrome c to oxygen | 0.007          | COX7B, COX7C, COX6C           |
| GO:0032496~response to lipopolysaccharide                           | 0.020          | PPBP, LY96, SNCA, SLPI, CXCL6 |
| GO:0006348~chromatin silencing at telomere                          | 0.037          | DPY30, HAT1                   |
| GO:0007098~centrosome cycle                                         | 0.037          | CETN3, TUBE1                  |
| GO:0050900~leukocyte migration                                      | 0.041          | NRAS, CD58, CEACAM8, PROS1    |
| GO:0043312~neutrophil degranulation                                 | 0.043          | PPBP, ANXA3                   |
| GO:0006091~generation of precursor metabolites and energy           | 0.043          | FECH, COX7C, COX6C            |
| GO:1902600~hydrogen ion transmembrane transport                     | 0.056          | COX7B, COX7C, COX6C           |
| GO:0006968~cellular defense response                                | 0.057          | LGALS3BP, LY96, TRAT1         |
| GO:0042742~defense response to bacterium                            | 0.063          | PPBP, CXCL6, IGLL5, ANXA3     |
| GO:0048821~erythrocyte development                                  | 0.090          | ARID4A, BPGM                  |

**b) CC**

| <i>Term</i>                             | <i>P Value</i> | <i>Genes</i>                                                                                                                                                                                           |
|-----------------------------------------|----------------|--------------------------------------------------------------------------------------------------------------------------------------------------------------------------------------------------------|
| GO:0005840~ribosome                     | 0.003          | MRPL13, MRPL50, RPS17, RPL34, SNCA, RSL24D1                                                                                                                                                            |
| GO:0072562~blood microparticle          | 0.014          | LGALS3BP, SLC4A1, PROS1, IGLL5, HBD                                                                                                                                                                    |
| GO:0070062~extracellular exosome        | 0.017          | NDUFB3, MOB1B, SELENBP1, MITD1, RRM2B, DAAM2, LGALS3BP, RPL34, CEACAM8, RNF11, SLC4A1, IGLL5, VASN, RAB2B, MINPP1, CRISP3, LAMTOR3, PDCD10, BPGM, MAN1A1, ANXA3, NRAS, RPS17, CD58, SLPI, VSIG4, PROS1 |
| GO:0005743~mitochondrial inner membrane | 0.018          | NDUFB3, MRPL13, FECH, MRPL50, COX7B, COX7C, ABCB10, COX6C                                                                                                                                              |
| GO:0005833~hemoglobin complex           | 0.071          | AHSP, HBD                                                                                                                                                                                              |
| GO:0042581~specific granule             | 0.076          | CRISP3, ANXA3                                                                                                                                                                                          |

c) MF

| <i>Term</i>                                                                 | <i>P Value</i> | <i>Genes</i>                                                      |
|-----------------------------------------------------------------------------|----------------|-------------------------------------------------------------------|
| GO:0004129~cytochrome-c oxidase activity                                    | 0.013          | COX7B, COX7C, COX6C                                               |
| GO:0042626~ATPase activity, coupled to transmembrane movement of substances | 0.027          | ABCD1, ABCB10, ABCG2                                              |
| GO:0019209~kinase activator activity                                        | 0.040          | MOB1B, LAMTOR3                                                    |
| GO:0045236~CXCR chemokine receptor binding                                  | 0.051          | PPBP, CXCL6                                                       |
| GO:0005509~calcium ion binding                                              | 0.057          | CD69, SNCA, MMP8, PPP3R1, CETN3, MAN1A1, PROS1, ANXA3, RCN2       |
| GO:0042803~protein homodimerization activity                                | 0.062          | DPY30, PDCD10, ABCD1, BCL2A1, ABCB10, SLC4A1, MITD1, ACVR1, ABCG2 |
| GO:0016407~acetyltransferase activity                                       | 0.073          | KAT2B, NAT1                                                       |
| GO:0050431~transforming growth factor beta binding                          | 0.089          | VASN, ACVR1                                                       |
